# Supplementary material for: 3-D image-based numerical computations of snow permeability: links to specific surface area, density, and microstructural anisotropy
Source: Copernicus journal article supplement (doi:10.5194/tc-6-939-2012), 2012-09-10
Supplement: Supplementary file [file tc-6-939-2012-supplement.pdf]

# **3D image-based numerical computations of snow permeability: links to specific surface area, density, and microstructural anisotropy**

N. Calonne, C. Geindreau, F. Flin, S. Morin, B. Lesaffre,  
S. Rolland du Roscoat and P. Charrier.

## **Auxiliary Materials**

## Table of Contents and General Information

### Table of Contents

|                                                           |      |
|-----------------------------------------------------------|------|
| List of the 35 samples used in the study.....             | p. 3 |
| Computed values for the 35 samples used in the study..... | p. 4 |
| Detailed information on sample <i>Fr</i> (PP).....        | p. 5 |
| Detailed information on sample <i>P04</i> (DF).....       | p. 6 |
| Detailed information on sample <i>P11</i> (RG).....       | p. 7 |
| Detailed information on sample <i>H02</i> (MF).....       | p. 8 |
| Detailed information on sample <i>E2b</i> (FC).....       | p. 9 |
| Detailed information on sample <i>Grad3</i> (DH).....     | p.10 |

### General Information

In the following, we provide the list of the samples used in this study with related information (**Table 1**) and values of permeability, density and specific surface area (**Table 2**). For each snow type [Fierz *et al.*, 2009], a typical microtomographic sample is presented together with its REV estimate in term of permeability:

- **Figures 1.a – 6.a:** 3-D images of the snow sample. The color levels of the images correspond to the fluid velocity (intensity) computed for a pressure drop of  $2 \times 10^{-2}$  Pa along the vertical direction (*z*) and a dynamic viscosity of air of  $1.8 \times 10^{-5}$  Pa s<sup>-1</sup>. The ice grains are represented in white.
- **Figures 1.b – 6.b:** Estimations of the REV (the smallest fraction of the sample volume from which a variable representative of the whole can be determined) with respect to the permeability. The REV is estimated by calculating values of permeability from several sub-volumes of increasing sizes. It is reached as soon as values remain constant when sub-volumes of calculations increase. For each figure, the permeability value computed on the largest volume size corresponds to that given in Table 2.

## List of the 35 Samples Used in the Study

| Sample name | Snow type | Voxel size ( $\mu\text{m}^3$ ) | Remarks                                                                                                                 | Main References      |
|-------------|-----------|--------------------------------|-------------------------------------------------------------------------------------------------------------------------|----------------------|
| Fr          | PP        | 4.91                           | Sampled at Col de Porte <sup>1</sup> , 14 February 2002.                                                                | Calonne et al., 2011 |
| I01         | PP        | 4.91                           | Sampled at Col de Porte, 15 h after the snowfall.                                                                       | Flin et al., 2004    |
| I03         | PP        | 4.91                           | 62 h after the snowfall, under isothermal conditions at $-2^\circ\text{C}$ .                                            | Flin et al., 2004    |
| I04         | PP        | 4.91                           | 81 h after the snowfall, under isothermal conditions at $-2^\circ\text{C}$ .                                            | Flin et al., 2004    |
| I08         | DF        | 4.91                           | 297 h after the snowfall, under isothermal conditions at $-2^\circ\text{C}$ .                                           | Flin et al., 2004    |
| I15         | RG        | 4.91                           | 806 h after the snowfall, under isothermal conditions at $-2^\circ\text{C}$ .                                           | Flin et al., 2004    |
| I19         | RG        | 4.91                           | 1381 h after the snowfall, under isothermal conditions at $-2^\circ\text{C}$ .                                          | Flin et al., 2004    |
| I21         | RG        | 4.91                           | 1694 h after the snowfall, under isothermal conditions at $-2^\circ\text{C}$ .                                          | Flin et al., 2004    |
| I23         | RG        | 4.91                           | 2026 h after the snowfall, under isothermal conditions at $-2^\circ\text{C}$ .                                          | Flin et al., 2004    |
| P03         | PP        | 8.48                           | Girose glacier <sup>2</sup> , 20 cm depth, 17 March 2009.                                                               | Flin et al., 2011    |
| P04         | DF        | 8.588                          | Girose glacier, 40 cm depth, 17 March 2009.                                                                             | Flin et al., 2011    |
| P06         | RG        | 6.158                          | Girose glacier, 60 cm depth, 17 March 2009.                                                                             | Flin et al., 2011    |
| P07         | RG        | 8.609                          | Girose glacier, 70 cm depth, 17 March 2009.                                                                             | Flin et al., 2011    |
| P08         | RG        | 8.552                          | Girose glacier, 100 cm depth, 17 March 2009.                                                                            | Flin et al., 2011    |
| P09         | RG        | 6.158                          | Girose glacier, 120 cm depth, 17 March 2009.                                                                            | Flin et al., 2011    |
| P10         | RG        | 6.103                          | Girose glacier, 165 cm depth, 17 March 2009.                                                                            | Flin et al., 2011    |
| P11         | RG        | 8.588                          | Girose glacier, 65 cm depth, 1 March 2009.                                                                              | Flin et al., 2011    |
| P14         | RG        | 6.154                          | Girose glacier, 80 cm depth, 1 March 2009.                                                                              | Flin et al., 2011    |
| P15         | RG        | 6.158                          | Girose glacier, 170 cm depth, 1 March 2009.                                                                             | Flin et al., 2011    |
| H00         | RG        | 8.609                          | Sieved snow, followed by isothermal conditions.                                                                         | Flin et al., 2011    |
| H01         | MF        | 8.609                          | Grain coarsening of water-saturated snow and drainage after 1h.                                                         | Flin et al., 2011    |
| H1-2        | MF        | 8.590                          | Grain coarsening of water-saturated snow and drainage after 6h.                                                         | Flin et al., 2011    |
| H02         | MF        | 8.590                          | Grain coarsening of water-saturated snow and drainage after 24h.                                                        | Flin et al., 2011    |
| H03         | MF        | 8.609                          | Grain coarsening of water-saturated snow and drainage after 48h.                                                        | Flin et al., 2011    |
| H05-G       | MF        | 9.46                           | Grain coarsening of water-saturated snow and drainage after 142h.                                                       | Flin et al., 2011    |
| Chamair     | MF        | 10                             | Grain coarsening of water-saturated snow and drainage.                                                                  | Coléou et al., 2001  |
| E2b         | FC        | 4.91                           | 3 weeks under a TG = $16 \text{ K m}^{-1}$ , $T_{\text{mean}} = -3^\circ\text{C}$ , sampled in the middle of the layer. | Flin et al., 2008    |
| 0A          | RG        | 8.392                          | Sieved snow, following by isothermal conditions.                                                                        | This study           |
| 1A          | RG        | 8.395                          | 3 days under a TG = $43 \text{ K m}^{-1}$ , $T_{\text{mean}} = -4^\circ\text{C}$ , sampled in the middle of the layer.  | This study           |
| 2A          | FC        | 8.373                          | 6 days under a TG = $43 \text{ K m}^{-1}$ , $T_{\text{mean}} = -4^\circ\text{C}$ , sampled in the middle of the layer.  | This study           |
| 3A          | DH        | 8.400                          | 9 days under a TG = $43 \text{ K m}^{-1}$ , $T_{\text{mean}} = -4^\circ\text{C}$ , sampled in the middle of the layer.  | Calonne et al., 2011 |
| 4A          | DH        | 8.397                          | 13 days under a TG = $43 \text{ K m}^{-1}$ , $T_{\text{mean}} = -4^\circ\text{C}$ , sampled in the middle of the layer. | Calonne et al., 2011 |
| 5A-G        | DH        | 9.655                          | 17 days under a TG = $43 \text{ K m}^{-1}$ , $T_{\text{mean}} = -4^\circ\text{C}$ , sampled in the middle of the layer. | This study           |
| 7A-G        | DH        | 9.672                          | 21 days under a TG = $43 \text{ K m}^{-1}$ , $T_{\text{mean}} = -4^\circ\text{C}$ , sampled in the middle of the layer. | This study           |
| Grad3       | DH        | 10                             | 8 days under a TG = $100 \text{ K m}^{-1}$ , $T_{\text{mean}} = -5^\circ\text{C}$ .                                     | Coléou et al., 2001  |

**Table 1:** List of the 35 snow samples used in the present work. Snow type is defined according to the International Classification for Seasonal Snow on the Ground [Fierz et al., 2009]: PP, Precipitation Particles; DF, Decomposing and Fragmented precipitation particles; RG, Rounded Grains; FC, Faceted Crystals; DH, Depth Hoar; MF, Melt Forms. Lines with gray background correspond to samples for which detailed information is provided below.

<sup>1</sup> 1325 m altitude, Chartreuse range, France.

<sup>2</sup> 3200 m altitude, Ecrins range, France.

## Computed Values for the 35 Samples Used in the Study

| Sample name | Snow type | $K_x \times 10^{-9}$ (m <sup>2</sup> ) | $K_y \times 10^{-9}$ (m <sup>2</sup> ) | $K_z \times 10^{-9}$ (m <sup>2</sup> ) | SSA (m <sup>2</sup> kg <sup>-1</sup> ) | Density (kg m <sup>-3</sup> ) |
|-------------|-----------|----------------------------------------|----------------------------------------|----------------------------------------|----------------------------------------|-------------------------------|
| Fr          | PP        | 3.58                                   | 3.77                                   | 3.69                                   | 55.30                                  | 120.49                        |
| I01         | PP        | 3.83                                   | 2.22                                   | 3.33                                   | 55.79                                  | 102.90                        |
| I03         | PP        | 3.79                                   | 3.93                                   | 4.03                                   | 41.37                                  | 123.34                        |
| I04         | PP        | 4.23                                   | 4.16                                   | 4.06                                   | 42.48                                  | 113.43                        |
| I08         | DF        | 4.60                                   | 4.38                                   | 4.79                                   | 29.32                                  | 147.71                        |
| I15         | RG        | 4.54                                   | 4.70                                   | 4.79                                   | 23.32                                  | 172.76                        |
| I19         | RG        | 4.73                                   | 4.82                                   | 4.84                                   | 19.90                                  | 192.48                        |
| I21         | RG        | 4.73                                   | 4.93                                   | 4.36                                   | 19.23                                  | 198.62                        |
| I23         | RG        | 2.82                                   | 2.62                                   | 2.47                                   | 17.24                                  | 256.30                        |
| P03         | PP        | 2.42                                   | 2.38                                   | 2.06                                   | 50.91                                  | 134.55                        |
| P04         | DF        | 6.14                                   | 6.38                                   | 4.62                                   | 25.36                                  | 157.54                        |
| P06         | RG        | 0.64                                   | 0.65                                   | 0.59                                   | 21.59                                  | 354.51                        |
| P07         | RG        | 2.45                                   | 2.44                                   | 1.83                                   | 17.15                                  | 280.05                        |
| P08         | RG        | 1.09                                   | 1.08                                   | 0.96                                   | 14.57                                  | 379.00                        |
| P09         | RG        | 1.26                                   | 1.29                                   | 1.04                                   | 12.29                                  | 396.14                        |
| P10         | RG        | 1.55                                   | 1.68                                   | 1.38                                   | 10.46                                  | 396.07                        |
| P11         | RG        | 0.46                                   | 0.45                                   | 0.40                                   | 20.76                                  | 413.75                        |
| P14         | RG        | 0.90                                   | 0.88                                   | 0.80                                   | 18.13                                  | 352.68                        |
| P15         | RG        | 1.54                                   | 1.54                                   | 1.73                                   | 16.09                                  | 315.54                        |
| H00         | RG        | 0.45                                   | 0.44                                   | 0.43                                   | 17.34                                  | 431.36                        |
| H01         | MF        | 0.48                                   | 0.45                                   | 0.48                                   | 6.99                                   | 550.93                        |
| H1-2        | MF        | 0.75                                   | 0.75                                   | 0.74                                   | 7.69                                   | 503.80                        |
| H02         | MF        | 1.22                                   | 1.22                                   | 1.27                                   | 6.18                                   | 471.70                        |
| H03         | MF        | 1.80                                   | 1.88                                   | 1.73                                   | 5.25                                   | 498.11                        |
| H05-G       | MF        | 3.96                                   | 4.57                                   | 4.87                                   | 3.78                                   | 471.70                        |
| Chamair     | MF        | 0.57                                   | 0.51                                   | 0.54                                   | 8.49                                   | 525.90                        |
| E2b         | FC        | 5.71                                   | 4.87                                   | 5.62                                   | 15.43                                  | 239.70                        |
| 0A          | RG        | 0.76                                   | 0.78                                   | 0.70                                   | 27.68                                  | 314.81                        |
| 1A          | RG        | 1.75                                   | 1.74                                   | 1.64                                   | 23.37                                  | 275.01                        |
| 2A          | FC        | 1.95                                   | 1.95                                   | 2.02                                   | 20.75                                  | 282.71                        |
| 3A          | DH        | 2.98                                   | 2.89                                   | 3.08                                   | 18.18                                  | 274.82                        |
| 4A          | DH        | 2.71                                   | 2.61                                   | 3.18                                   | 15.19                                  | 315.36                        |
| 5A-G        | DH        | 3.77                                   | 3.70                                   | 4.39                                   | 14.89                                  | 284.09                        |
| 7A-G        | DH        | 3.92                                   | 3.95                                   | 4.84                                   | 13.42                                  | 311.23                        |
| Grad3       | DH        | 0.65                                   | 0.63                                   | 1.06                                   | 21.84                                  | 369.18                        |

**Table 2:** List of the snow samples and types with the corresponding computed values of the permeability in the x, y and z direction ( $K_x$ ,  $K_y$  and  $K_z$ ), the Specific Surface Area (SSA) and the density. All these values were computed on the largest volume available of each sample, which is at least equal to the REV of the three variables. Snow type is defined according to the International Classification for Seasonal Snow on the Ground [Fierz et al., 2009]: PP, Precipitation Particles; DF, Decomposing and Fragmented precipitation particles; RG, Rounded Grains; FC, Faceted Crystals; DH, Depth Hoar; MF, Melt Forms. Lines with gray background correspond to samples for which detailed information is provided below.

### Sample *Fr* - Precipitation Particles (PP)

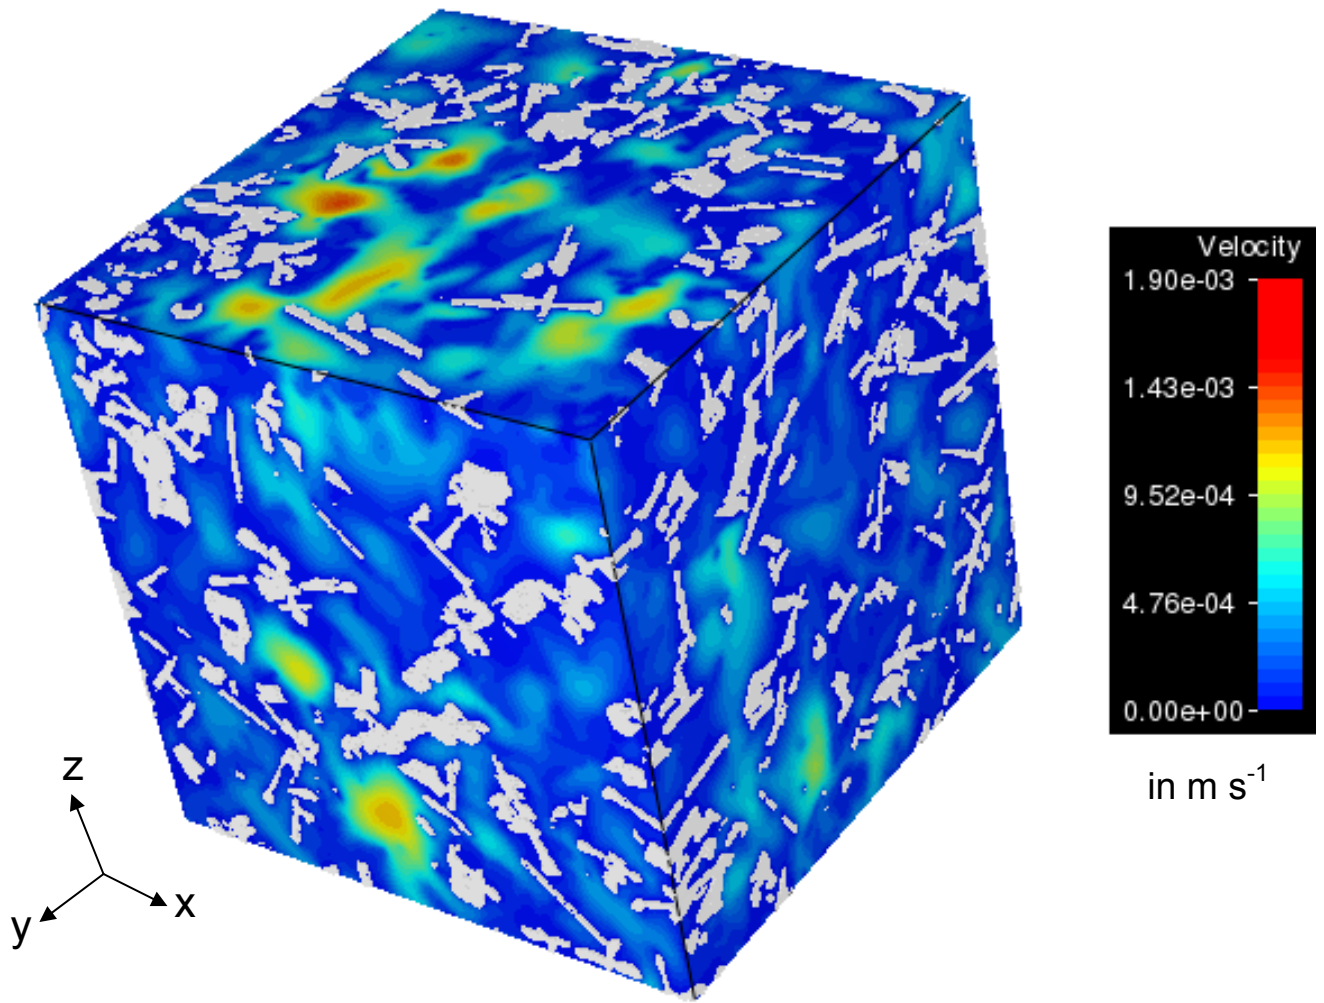

**Figure 1.a:** 3-D visualization of the fluid velocity for a pressure drop along z direction (size =  $750^3$  voxels, 1 vox. =  $4.91 \mu\text{m}$ ).

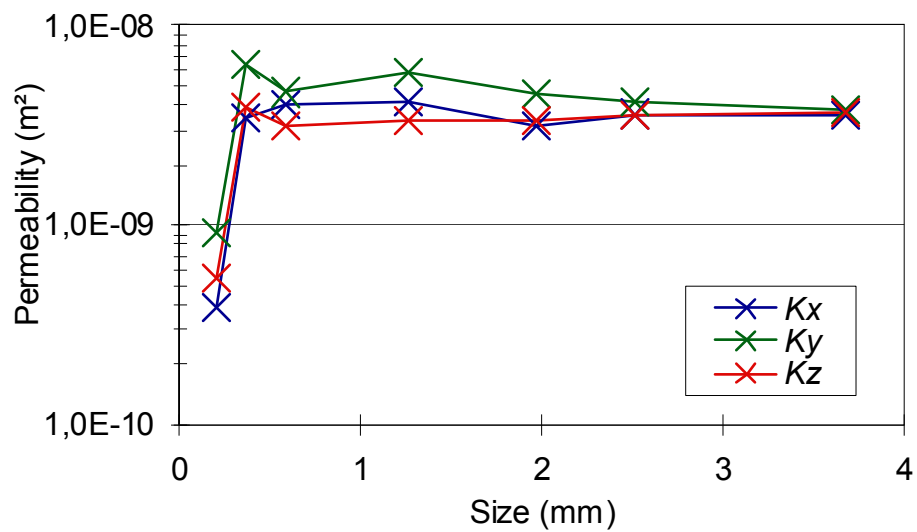

**Figure 1.b:** Dependency of  $K$  estimates with sample size.

### Sample P04 - Decomposing and Fragmented precipitation particles (DF)

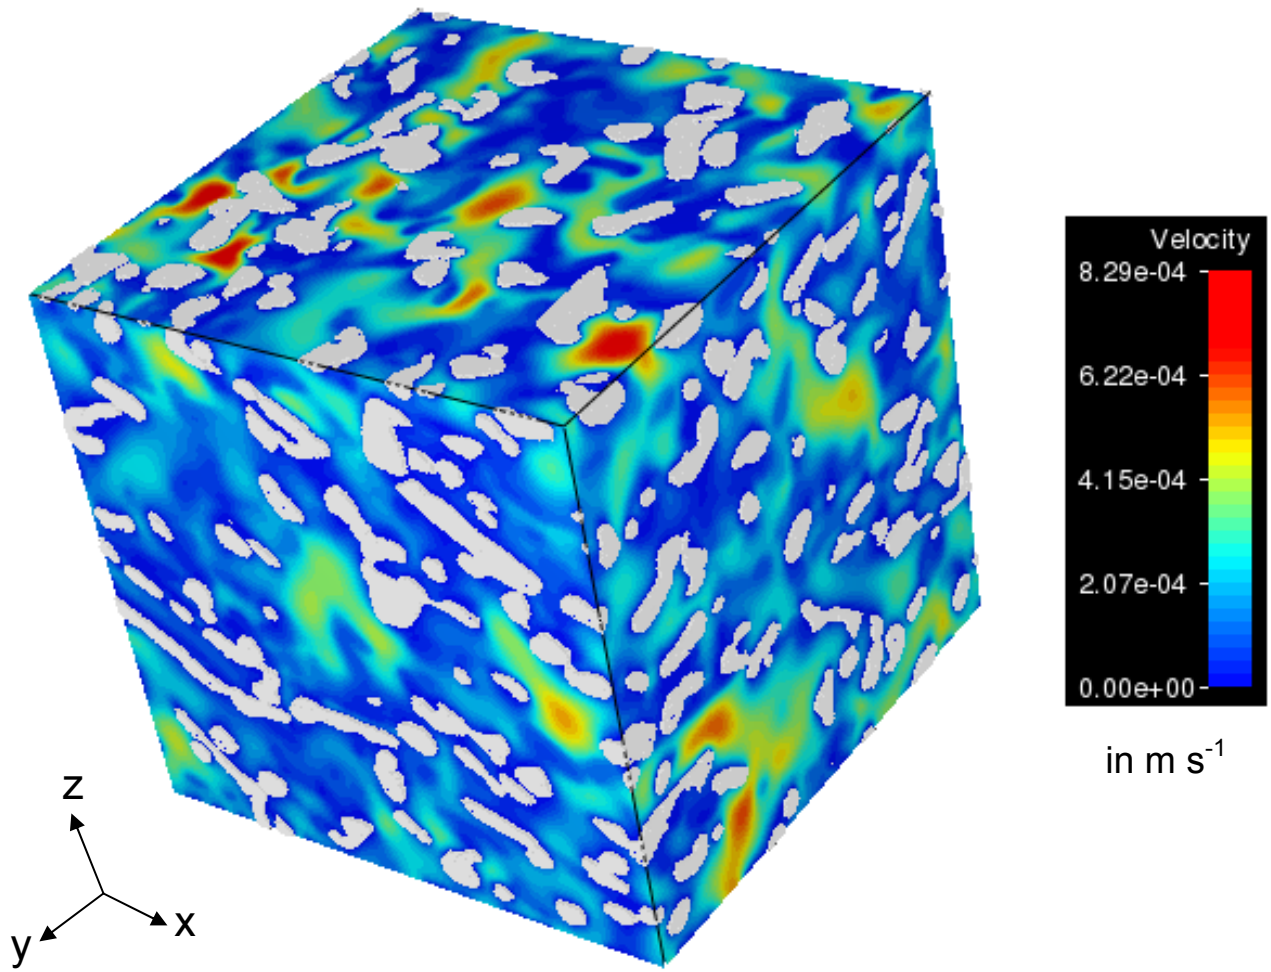

**Figure 2.a:** 3-D visualization of the fluid velocity for a pressure drop along z direction (size = 512<sup>3</sup> voxels, 1 vox. = 8.588 μm).

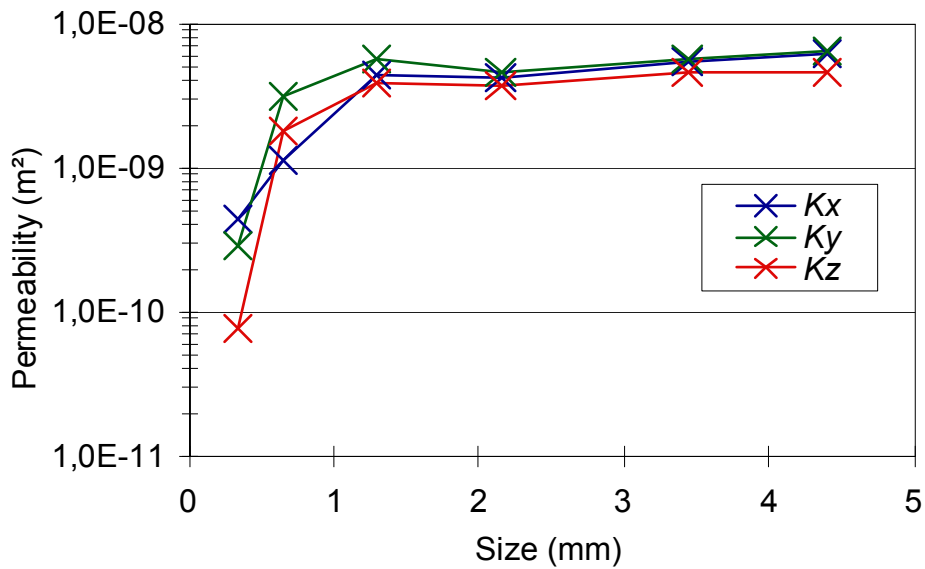

**Figure 2.b:** Dependency of **K** estimates with sample size.

**Sample P11 - Rounded Grains (RG)**

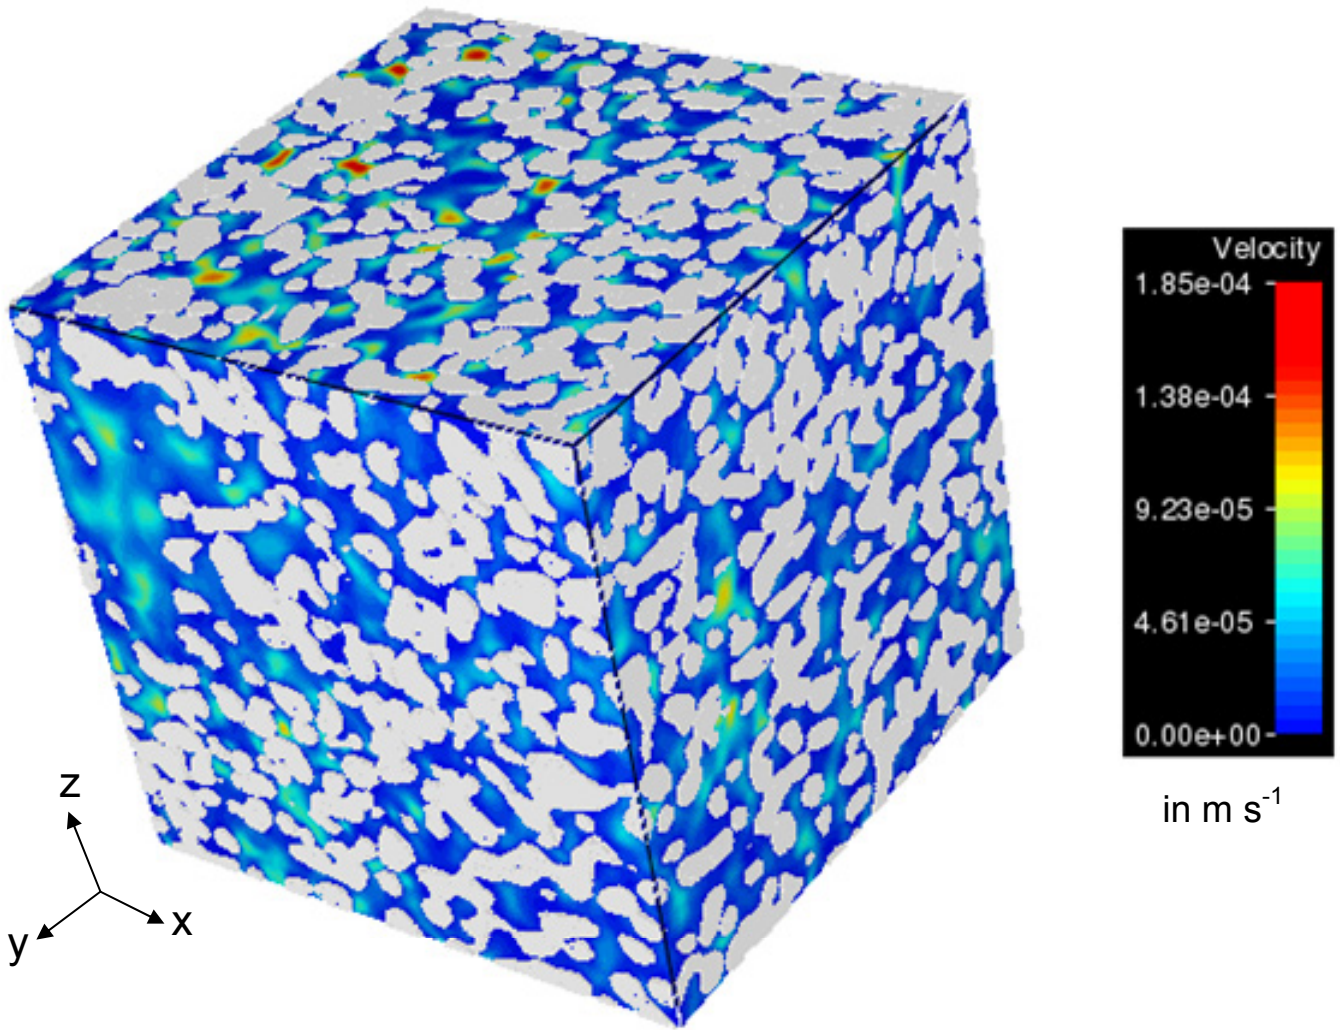

**Figure 3.a:** 3-D visualization of the fluid velocity for a pressure drop along z direction (size =  $512^3$  voxels, 1 vox. =  $8.588 \mu\text{m}$ ).

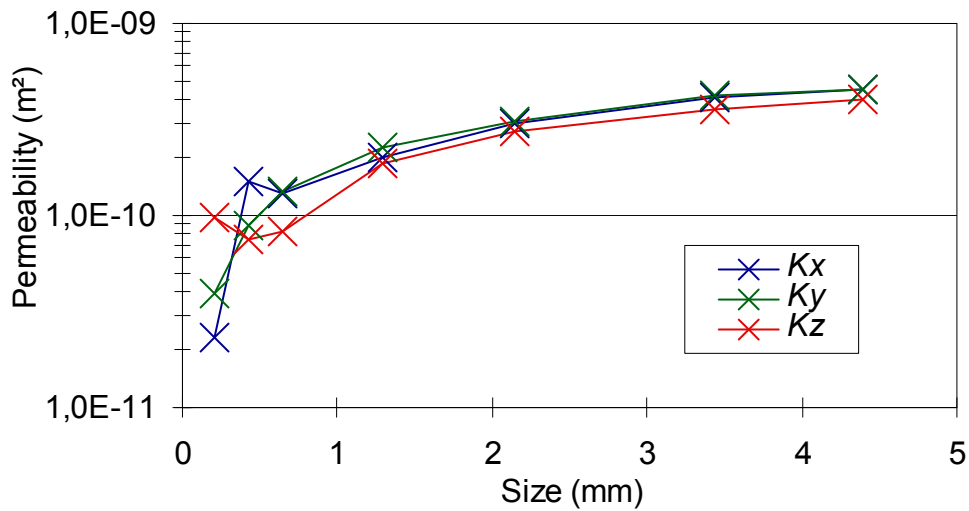

**Figure 3.b:** Dependency of **K** estimates with sample size.

**Sample H02 - Melt Forms (MF)**

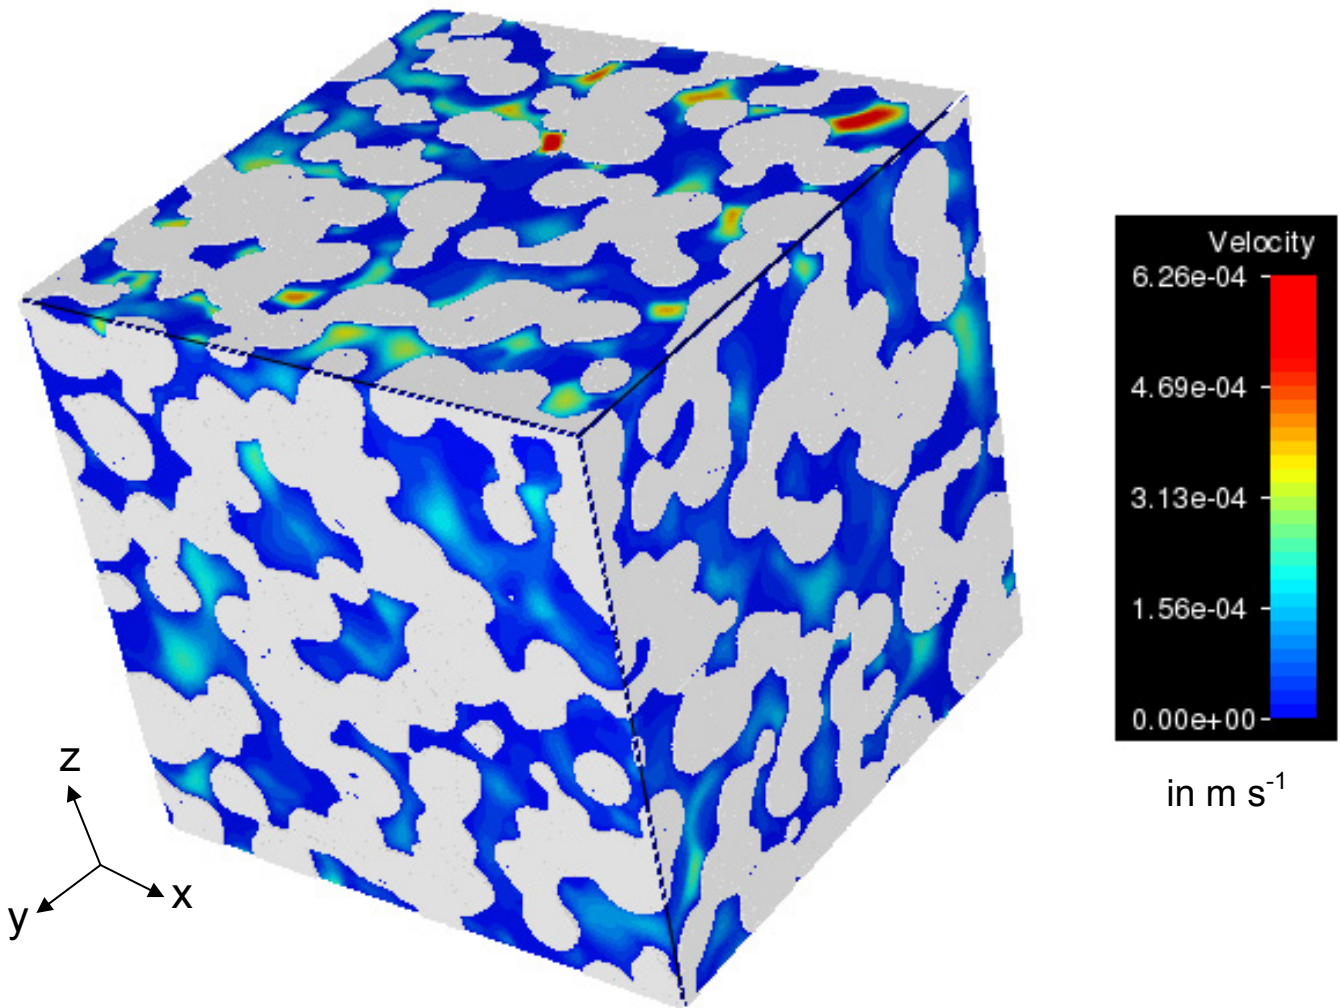

**Figure 4.a:** 3-D visualization of the fluid velocity for a pressure drop along z direction (size = 651<sup>3</sup> voxels, 1 vox. = 8.590 μm).

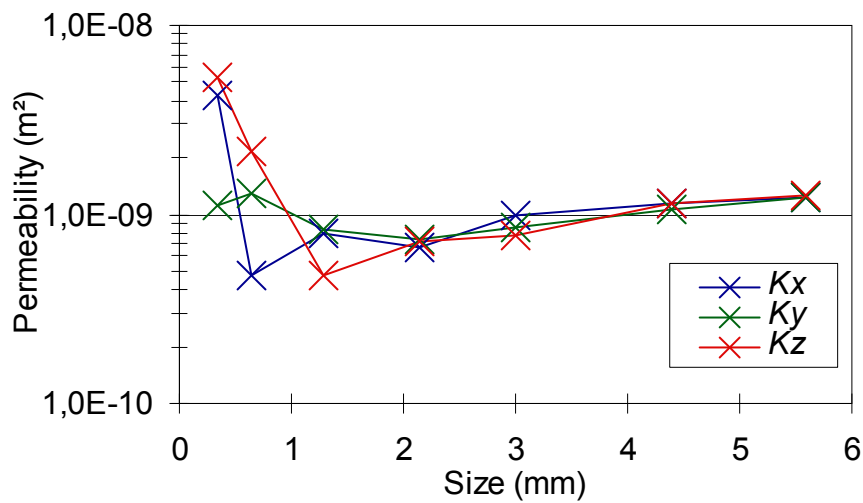

**Figure 4.b:** Dependency of **K** estimates with sample size.



### Sample E2b – Faceted Crystals (FC)

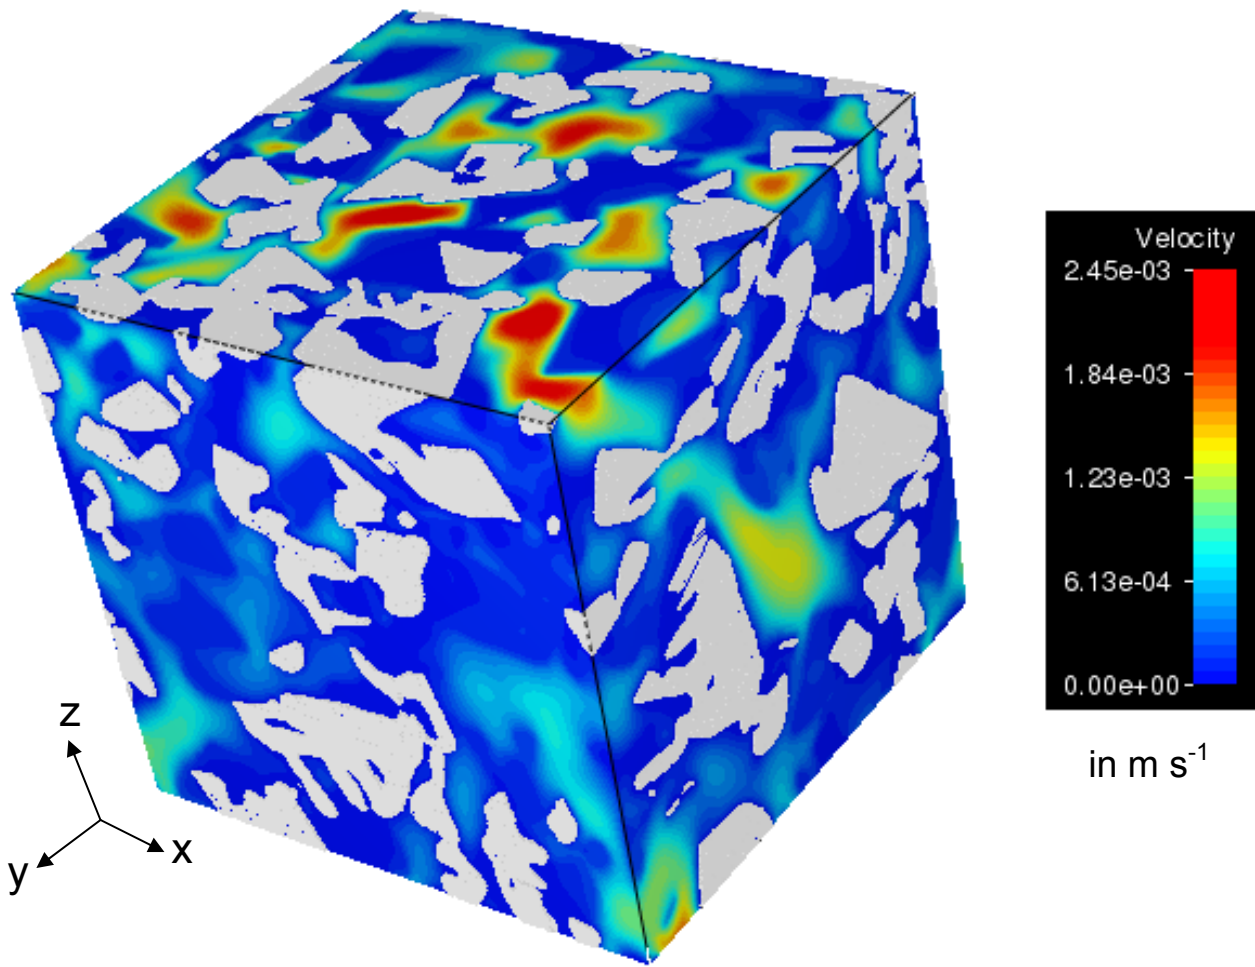

**Figure 5.a:** 3-D visualization of the fluid velocity for a pressure drop along z direction (size = 750<sup>3</sup> voxels, 1 vox. = 4.91 μm).

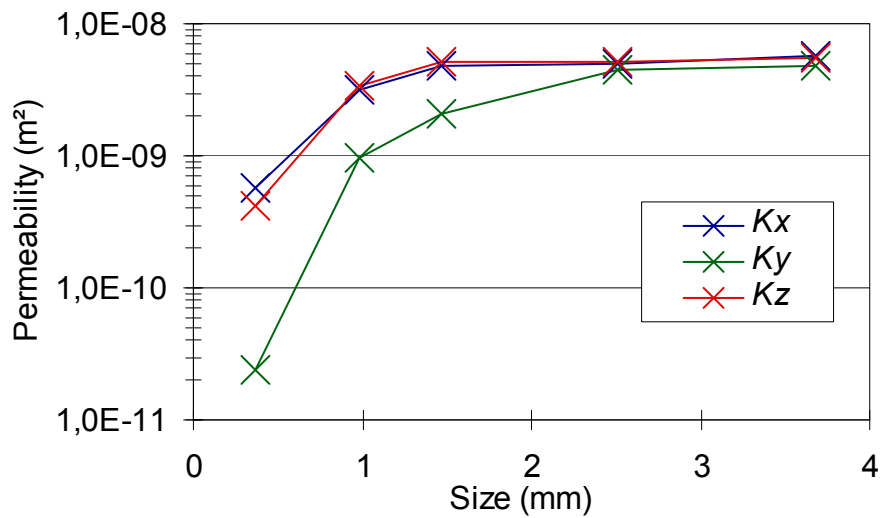

**Figure 5.b:** Dependency of **K** estimates with sample size.

**Sample Grad3 – Depth Hoar (DH)**

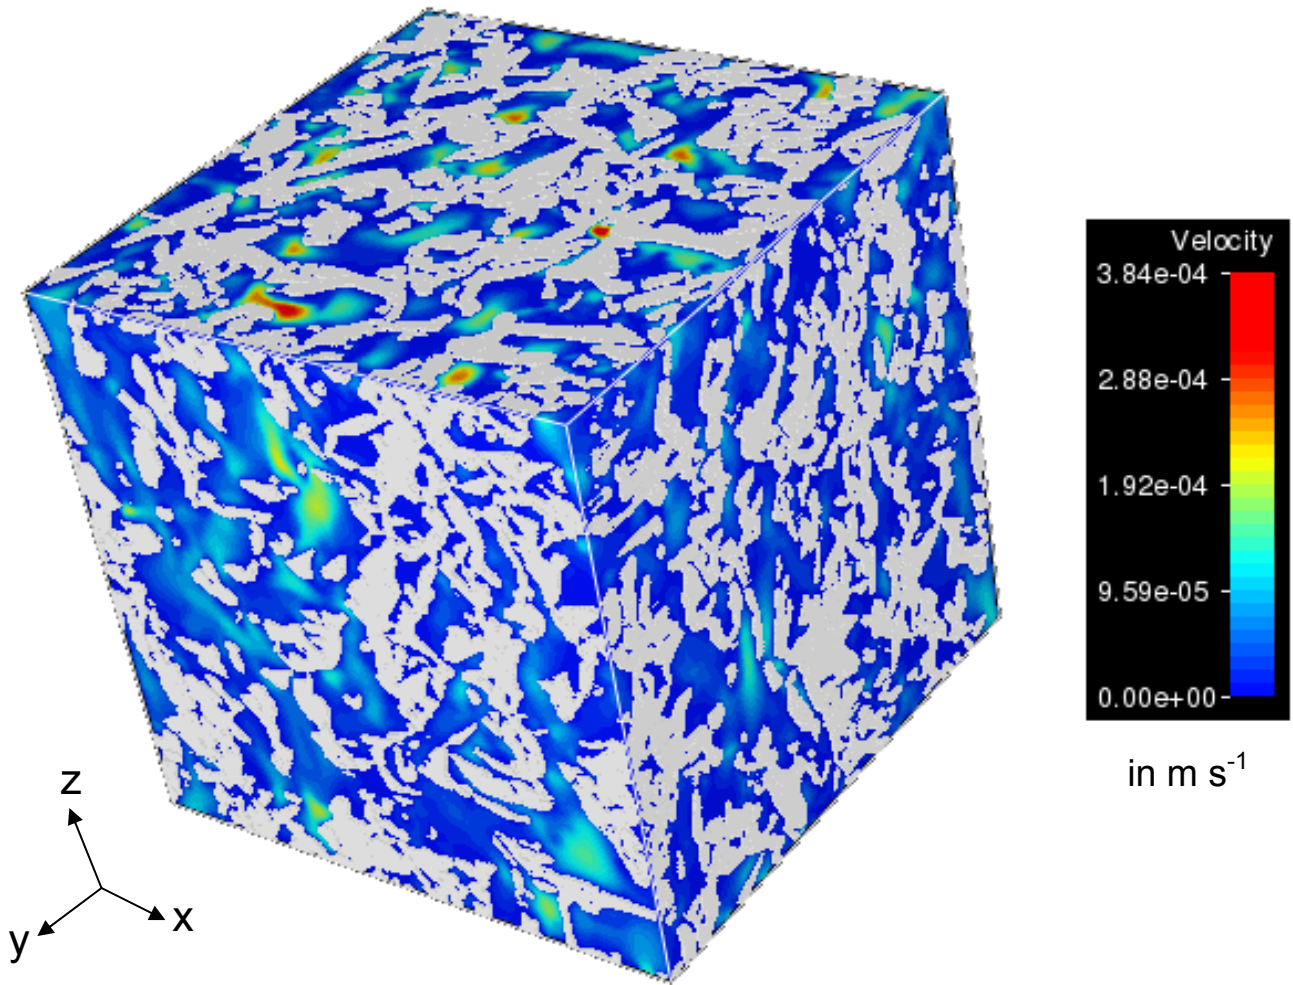

**Figure 6.a:** 3-D visualization of the fluid velocity for a pressure drop along z direction (size = 600<sup>3</sup> voxels, 1 vox. = 10 μm).

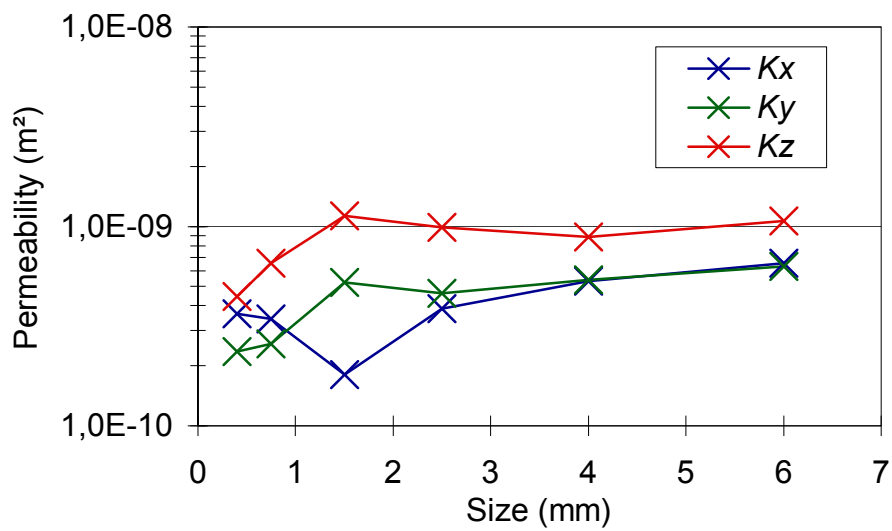

**Figure 6.b:** Dependency of **K** estimates with sample size.
